# Supplementary material for: Brief intervention to reduce fatigue impact in patients with inflammatory arthritis: design and outcomes of a single-arm feasibility study
Source: BMJ Open. 2022 Jul 18;12(7):e054627. doi: 10.1136/bmjopen-2021-054627 (PMC9297231; doi:10.1136/bmjopen-2021-054627)
Supplement: Supplementary data [file bmjopen-2021-054627supp002.pdf]

**SUPPLEMENTARY TABLE S1 (PERCENTAGE OF COMPLETE/IMPUTED RESPONSES)**

| <b>Measure</b>                      | <b>Time Point 0</b> | <b>Time Point 1</b> | <b>Time Point 2</b> |
|-------------------------------------|---------------------|---------------------|---------------------|
| BRAF-NRS Fatigue Effect (0-10)      | 100%                | 87.00%              | 84.78%              |
| BRAF-NRS Coping (0-10)              | 89.13%              | 73.91%              | 73.91%              |
| RAID Final Score (0-10)             | 89.13%              | 73.91%              | 73.91%              |
| BRAF-MDQ Physical Severity (0-22)   | 89.13%              | 73.91%              | 73.91%              |
| BRAF MDQ Living with Fatigue (0-21) | 89.13%              | 73.91%              | 73.91%              |
| BRAF-MDQ Cognitive (0-15)           | 89.13%              | 73.91%              | 73.91%              |
| BRAF-MDQ Emotional (0-12)           | 89.13%              | 73.91%              | 73.91%              |
| BRAF-MDQ Total (0-70)               | 89.13%              | 73.91%              | 73.91%              |
| MHAQ Mean Score (0-4)               | 89.13%              | 71.74%              | 73.91%              |
| HCCQ (1-7)                          | 84.78%              | 73.91%              | 78.26%              |
| RASE (28-140)                       | 82.61%              | 71.74%              | 76.09%              |
